# Supplementary material
Source: publisher figshare collection journal article supplement (https://acs.figshare.com/ndownloader/files/3749380)
Supplement: Supplementary file 1 [file 3749380]

Supporting information for  
*Environ. Sci. Technol.*

## Isotope Fractionation Associated with the Indirect Photolysis of Substituted Anilines in Aqueous Solution

Marco Ratti<sup>1,2</sup>, Silvio Canonica<sup>1</sup>, Kristopher McNeill<sup>2</sup>, Jakov Bolotin<sup>1</sup>,  
and Thomas B. Hofstetter<sup>\*,1,2</sup>

<sup>1</sup>Eawag, Swiss Federal Institute of Aquatic Science and Technology, CH-8600  
Dübendorf, Switzerland

<sup>2</sup>Institute of Biogeochemistry and Pollutant Dynamics (IBP), ETH Zürich, CH-8092  
Zürich, Switzerland

\*Corresponding author: [thomas.hofstetter@eawag.ch](mailto:thomas.hofstetter@eawag.ch)  
phone +41 58 765 50 76, fax +41 58 765 50 28

## Contents

|                                                                                                                                                                              |          |
|------------------------------------------------------------------------------------------------------------------------------------------------------------------------------|----------|
| <b>S1 Chemicals</b>                                                                                                                                                          | <b>2</b> |
| <b>S2 Tables</b>                                                                                                                                                             | <b>2</b> |
| S2.1 Reaction rate constants . . . . .                                                                                                                                       | 2        |
| <b>S3 Figures</b>                                                                                                                                                            | <b>3</b> |
| S3.1 Kinetics and isotope fractionation associated with the transformation of<br>aniline, 4-Cl-aniline, and 4-OCH <sub>3</sub> -aniline by <sup>3</sup> AQDS* . . . . .      | 3        |
| S3.2 Kinetics and isotope fractionation associated with the transformation of<br>aniline, 4-CH <sub>3</sub> -, and 4-OCH <sub>3</sub> -aniline by <sup>3</sup> MB* . . . . . | 4        |
| <b>S4 Product analysis</b>                                                                                                                                                   | <b>5</b> |
| S4.1 Indirect Phototransformation of 4-CH <sub>3</sub> -aniline by <sup>3</sup> AQDS* . . . . .                                                                              | 5        |
| S4.2 Indirect Phototransformation of aniline by <sup>3</sup> AQDS* . . . . .                                                                                                 | 6        |
| S4.3 Indirect Phototransformation of 4-Cl-aniline by <sup>3</sup> AQDS* . . . . .                                                                                            | 8        |

## S1 Chemicals

Chemicals and gases were purchased from various manufacturers and used without further treatment. A list of compound names, purities, and suppliers follows. Aniline ( $\geq 99.5\%$ ), *p*-toluidine (99.6%), 4-chloroaniline (98%), *p*-anisidine ( $\geq 99\%$ ), methylene blue (certified by the Biological Stain Commission) and potassium phosphate monobasic ( $>99\%$ ) were purchased from Sigma-Aldrich (Buchs SG, Switzerland); anthraquinone-1,5-disulfonic acid disodium salt (98%) was from ABCR GmbH & CO. KG (Karlsruhe, Deutschland); hydrochloric acid (32%) and sodium hydroxide (98%), sodium chloride ( $>99\%$ ) were from Merck (Dietikon, Switzerland); methanol (for HPLC gradient) from Acros Organics (Geel, Belgium). All aqueous solutions were prepared in nanopure water (18.2 M $\Omega$ -cm, Barnstead NANOpure Diamond Water Purification System).

The carrier and reference gas for GC and GC/IRMS included helium (He, 99.999%), N<sub>2</sub> (99.9999%), CO<sub>2</sub> (99.999%), H<sub>2</sub> (99.999%), synthetic air (20  $\pm$  1% O<sub>2</sub> in N<sub>2</sub>, 99.9995%), O<sub>2</sub> (99.9995%) and, N<sub>2</sub> (99.9995%) from Carbagas (Rümlang, Switzerland). All aqueous solutions were prepared in nanopure water (18.2 M $\Omega$ -cm, Barnstead NANOpure Diamond Water Purification System).

## S2 Tables

### S2.1 Reaction rate constants

**Table S1** Pseudo-first order reaction rate constants for the indirect photolysis of aniline and 4-Cl-, 4-CH<sub>3</sub>-, 4-OCH<sub>3</sub>-aniline, by excited triplet states of 9,10-anthraquinone-1,5-disulfonate (<sup>3</sup>AQDS\*) and methylene blue (<sup>3</sup>MB\*). Uncertainties are 95% confidence intervals.

| Compound                    | pH  | $k_{\text{obs}}/\text{h}^{-1}$ |
|-----------------------------|-----|--------------------------------|
| <sup>3</sup> AQDS*          |     |                                |
| aniline                     | 7.0 | $0.6 \pm 0.2$                  |
| 4-Cl-aniline                | 7.0 | $1.7 \pm 0.3$                  |
| 4-CH <sub>3</sub> -aniline  | 7.0 | $1.6 \pm 0.6$                  |
| 4-OCH <sub>3</sub> -aniline | 7.5 | $0.14 \pm 0.02$                |
| <sup>3</sup> MB*            |     |                                |
| aniline                     | 7.0 | $31 \pm 6$                     |
| 4-Cl-aniline                | 7.0 | $34 \pm 3$                     |
| 4-CH <sub>3</sub> -aniline  | 7.0 | n.d.                           |
| 4-OCH <sub>3</sub> -aniline | 7.5 | n.d.                           |

## S3 Figures

### S3.1 Kinetics and isotope fractionation associated with the transformation of aniline, 4-Cl-aniline, and 4-OCH<sub>3</sub>-aniline by <sup>3</sup>AQDS\*

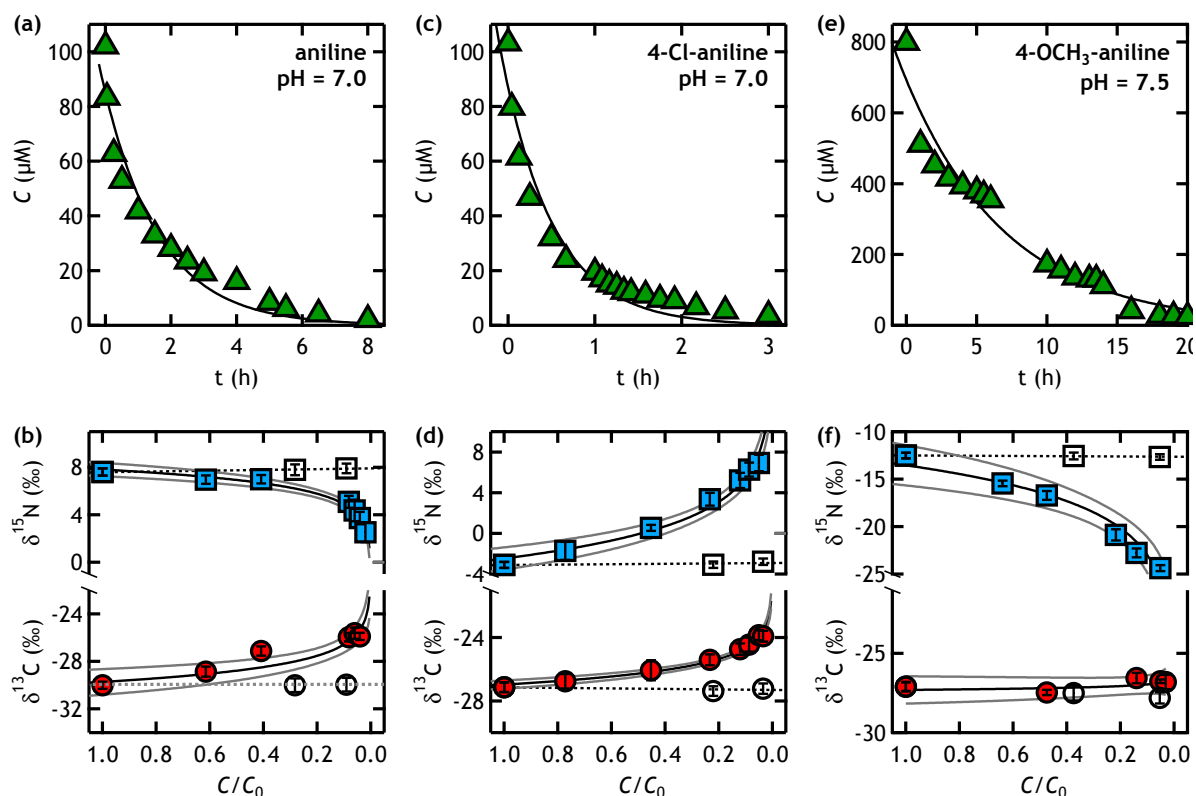

**Figure S1** Transformation of aniline (panels a,b), 4-Cl-aniline (panels c,d) and 4-OCH<sub>3</sub>-aniline (panels e, f) by excited triplet states of 9,10-anthraquinone-1,5-disulfonate (<sup>3</sup>AQDS\*). Total AQDS concentration was 1.0 mM. Panels (a), (c), and (e) illustrate substrate disappearance. The solid lines were calculated using pseudo-first-order decay kinetics. Panels (b), (d), and (f): C and N isotope signatures ( $\delta^{13}\text{C}$ , circles,  $\delta^{15}\text{N}$ , squares) vs. fraction of remaining substrate ( $C/C_0$ ). Uncertainties of data points are standard deviations of triplicate measurements. Solid lines were calculated with eq. 1; gray lines are 95% confidence intervals. Control experiments were treated identically but reactors did not contain photosensitizers (empty symbols, dotted lines).

### S3.2 Kinetics and isotope fractionation associated with the transformation of aniline, 4-CH<sub>3</sub>-, and 4-OCH<sub>3</sub>-aniline by <sup>3</sup>MB\*

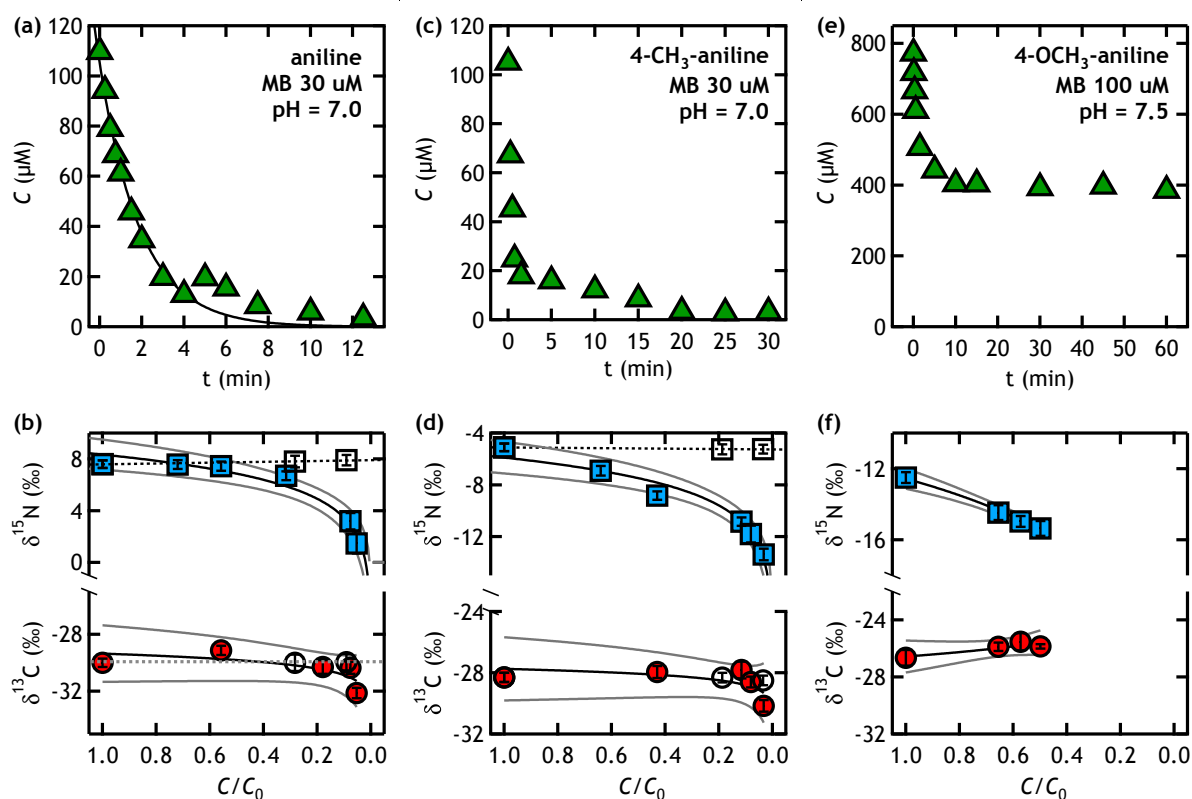

**Figure S2** Transformation of aniline (panels a,b), 4-CH<sub>3</sub>-aniline (panels c,d) and 4-OCH<sub>3</sub>-aniline (panels e, f) by excited triplet states of methylene blue (<sup>3</sup>MB\*). Panels (a), (c), and (e) illustrate substrate disappearance. The solid line in panel (a) was calculated using pseudo-first-order decay kinetics. Panels (b), (d), and (f): C and N isotope signatures ( $\delta^{13}\text{C}$ , circles,  $\delta^{15}\text{N}$ , squares) vs. fraction of remaining substrate ( $C/C_0$ ). Uncertainties of data points are standard deviations of triplicate measurements. Solid lines were calculated with eq. 1; gray lines are 95% confidence intervals. Control experiments were treated identically but reactors did not contain photosensitizers (empty symbols, dotted lines).

## S4 Product analysis

### S4.1 Indirect Phototransformation of 4-CH<sub>3</sub>-aniline by <sup>3</sup>AQDS\*

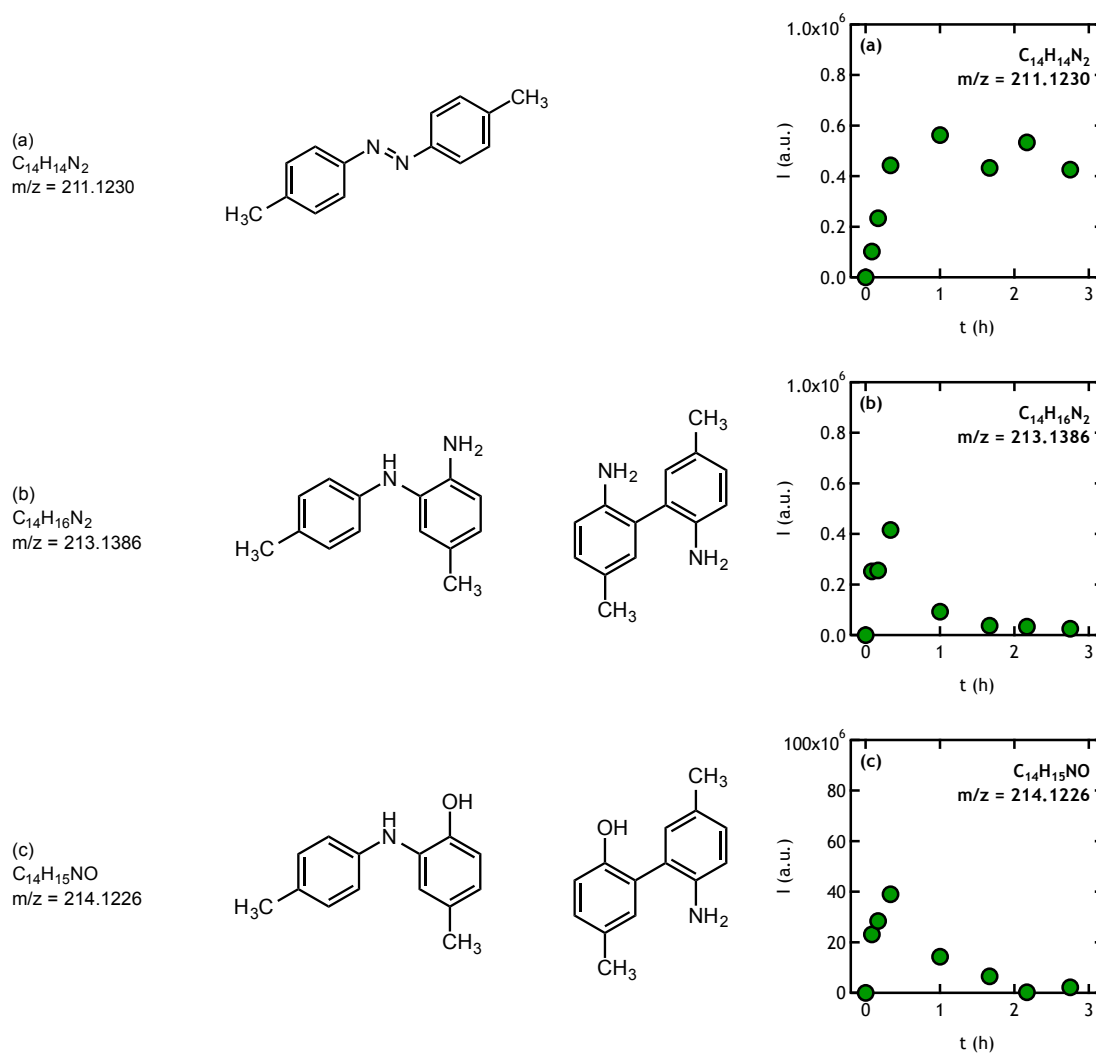

**Figure S3** Molecular structure of possible reaction products from the indirect phototransformation of 4-CH<sub>3</sub>-aniline by <sup>3</sup>AQDS\* at pH = 7.0 (total AQDS = 1mM). Concentration dynamics of reaction products are shown as signal areas of the investigated  $m/z$ -ratio vs. irradiation time.

## S4.2 Indirect Phototransformation of aniline by $^3\text{AQDS}^*$

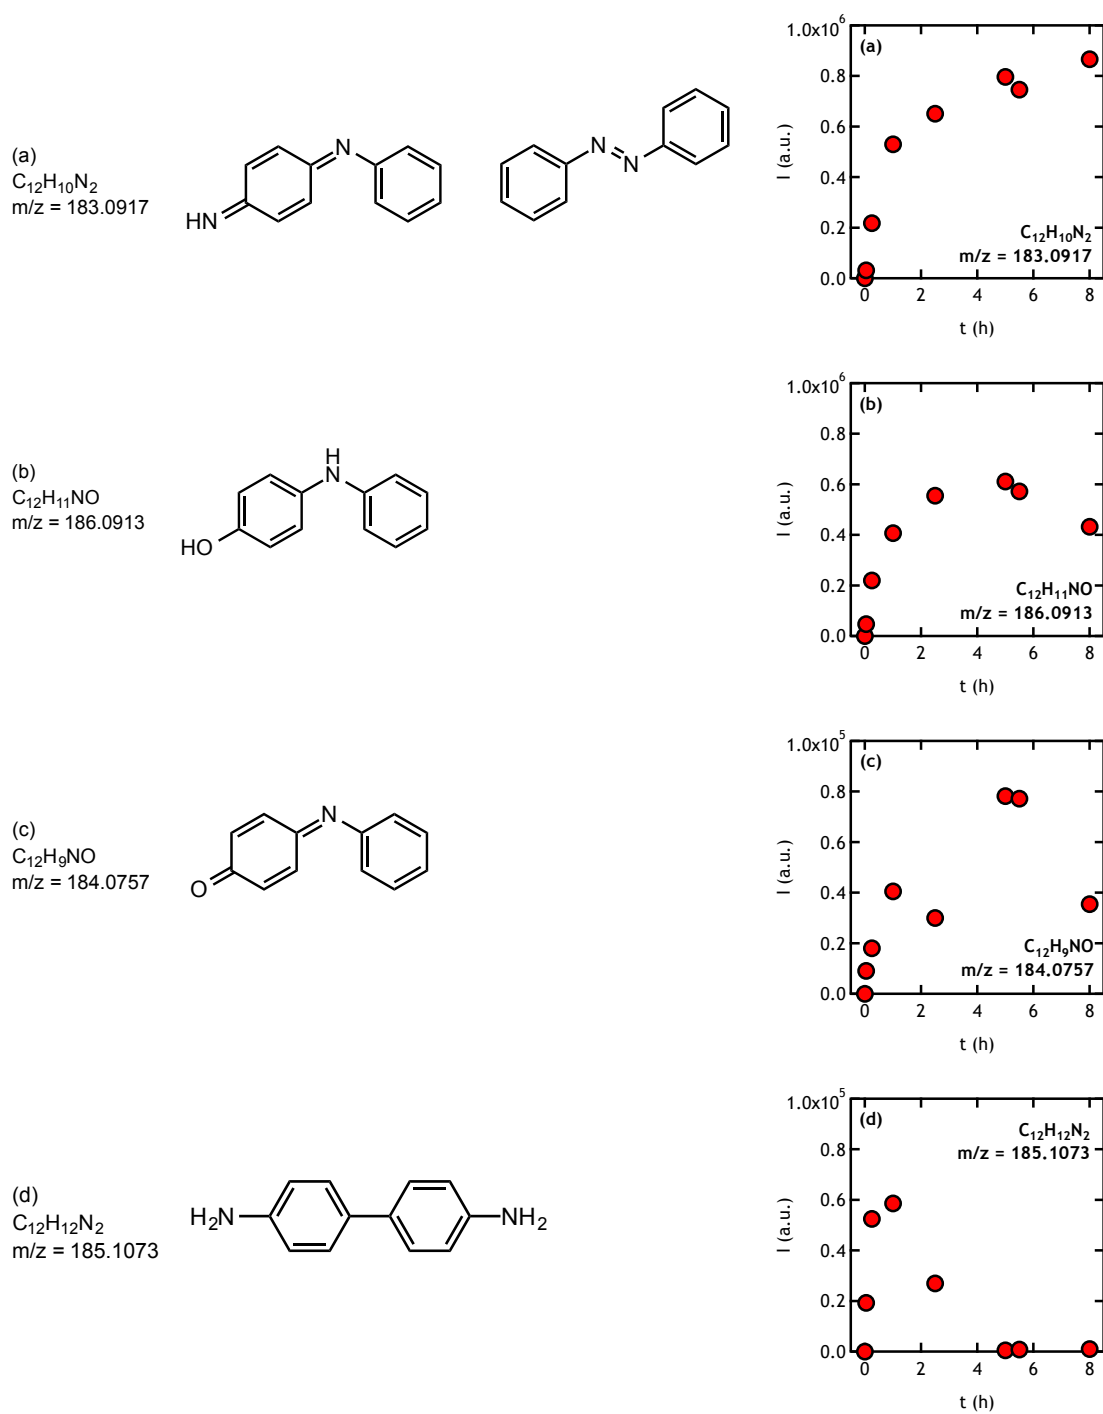

(continues on next page)

(e)  
 $C_{18}H_{15}N_3$   
 $m/z = 274.1339$

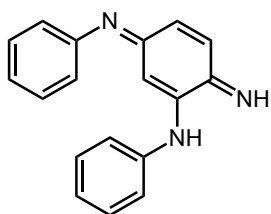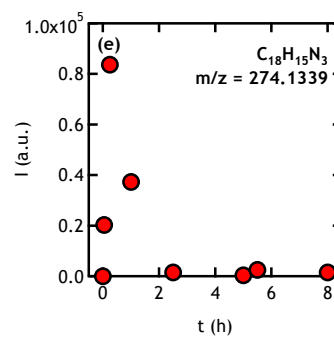

**Figure S4** Molecular structure of possible reaction products from the indirect phototransformation of aniline by  $^3AQDS^*$  at pH = 7.0 (total AQDS = 1mM). Concentration dynamics of reaction products are shown as signal areas of the investigated  $m/z$ -ratio vs. irradiation time.

### S4.3 Indirect Phototransformation of 4-Cl-aniline by $^3\text{AQDS}^*$

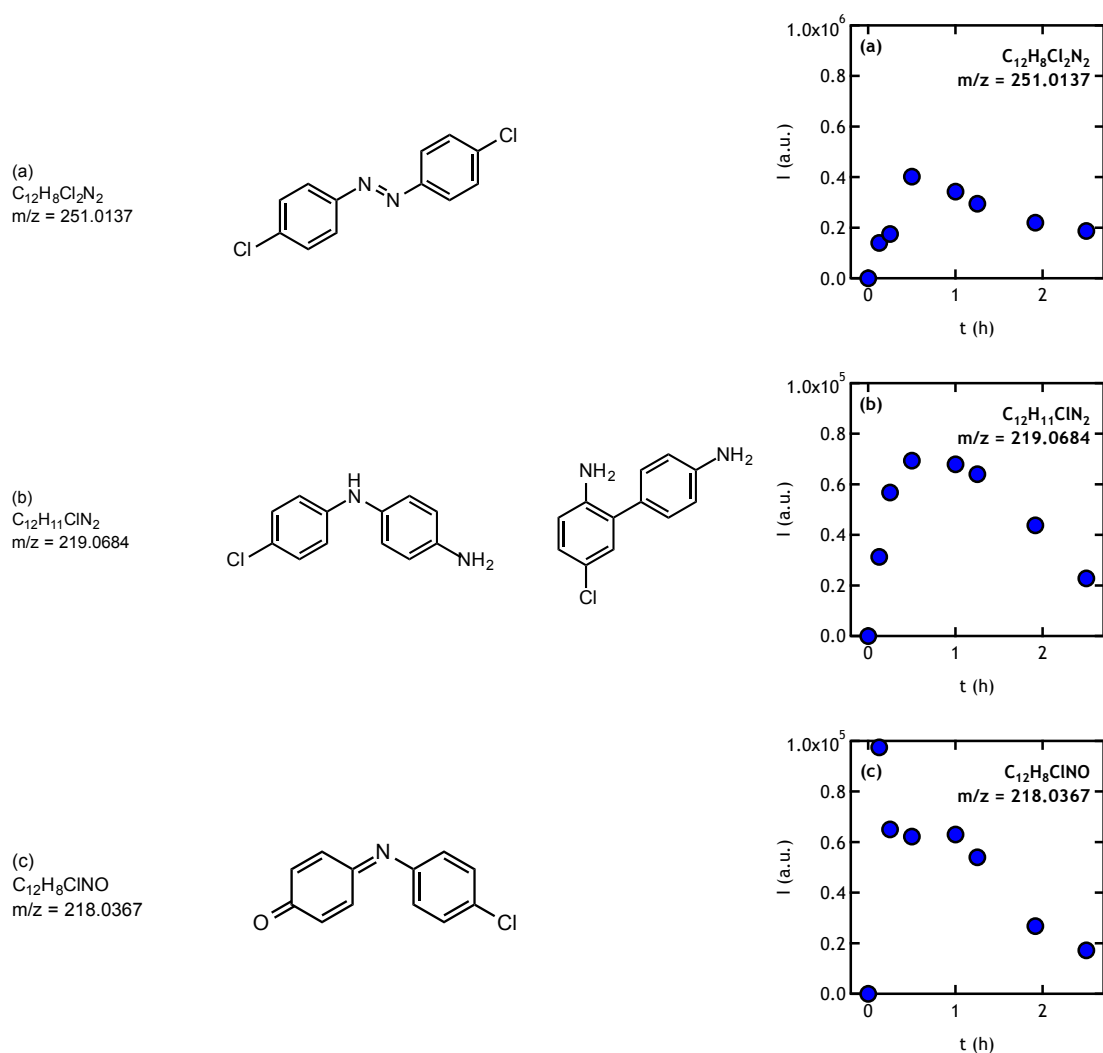

**Figure S5** Molecular structure of possible reaction products from the indirect phototransformation of 4-Cl-aniline by  $^3\text{AQDS}^*$  at  $\text{pH} = 7.0$  (total AQDS = 1mM). Concentration dynamics of reaction products are shown as signal areas of the investigated  $m/z$ -ratio vs. irradiation time.
